# Supplementary material
Source: PubMed Central journal article supplement (PMC9357136)

Fig. 2A

PVN synaptosomes

Input IgG IP: pSer  
Veh FK506 Veh FK506 Veh FK506

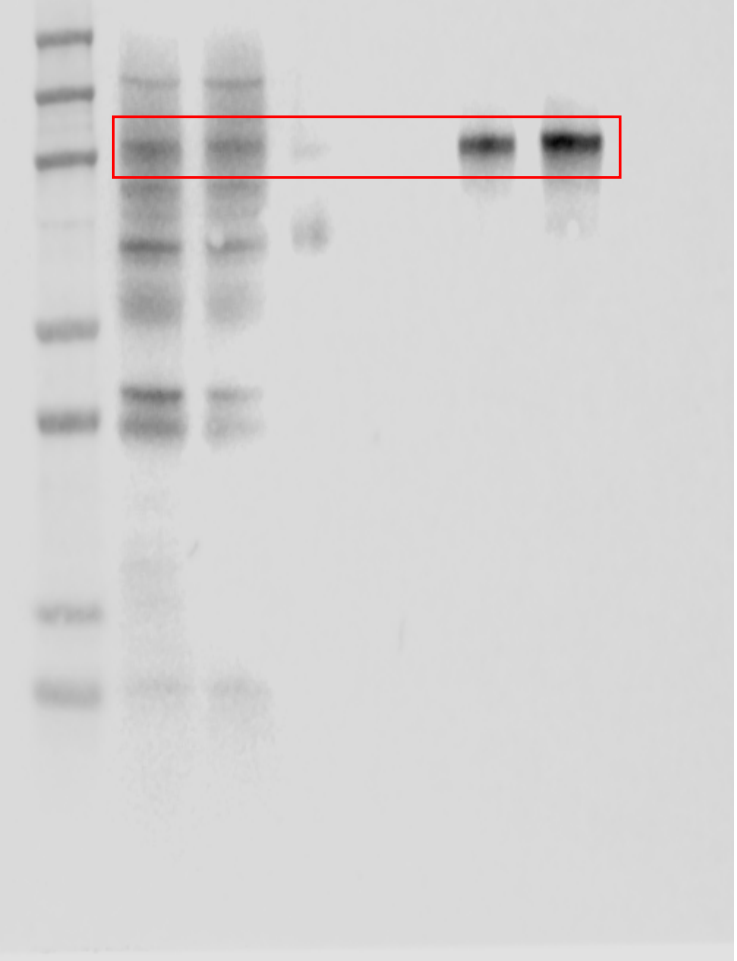

GluN1

PVN synaptosomes

Input IgG IP: pThr  
Veh FK506 Veh FK506 Veh FK506

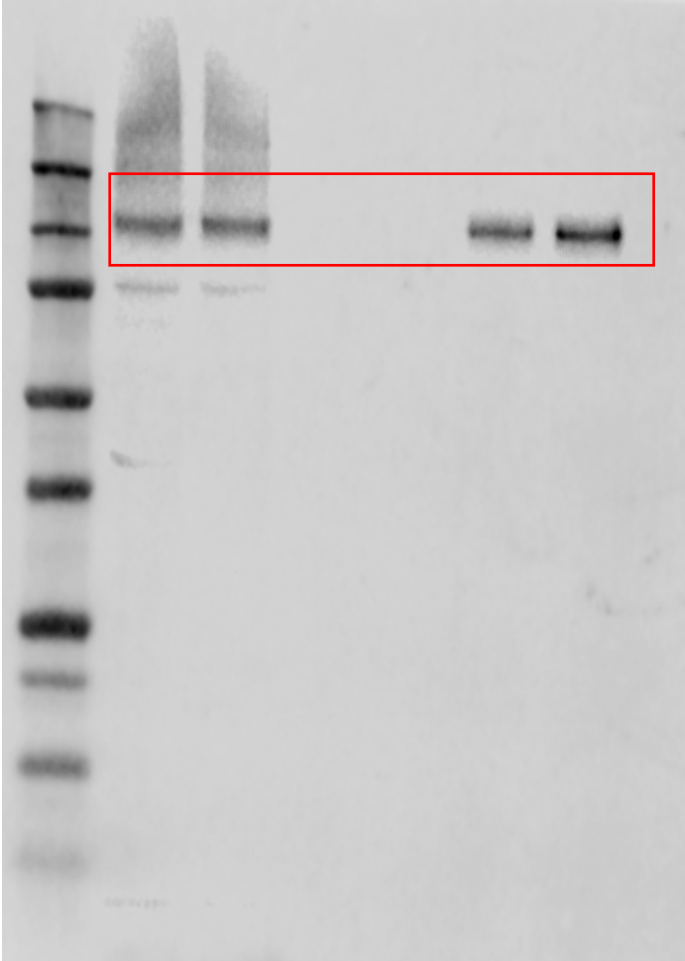

GluN1

Fig. 2B

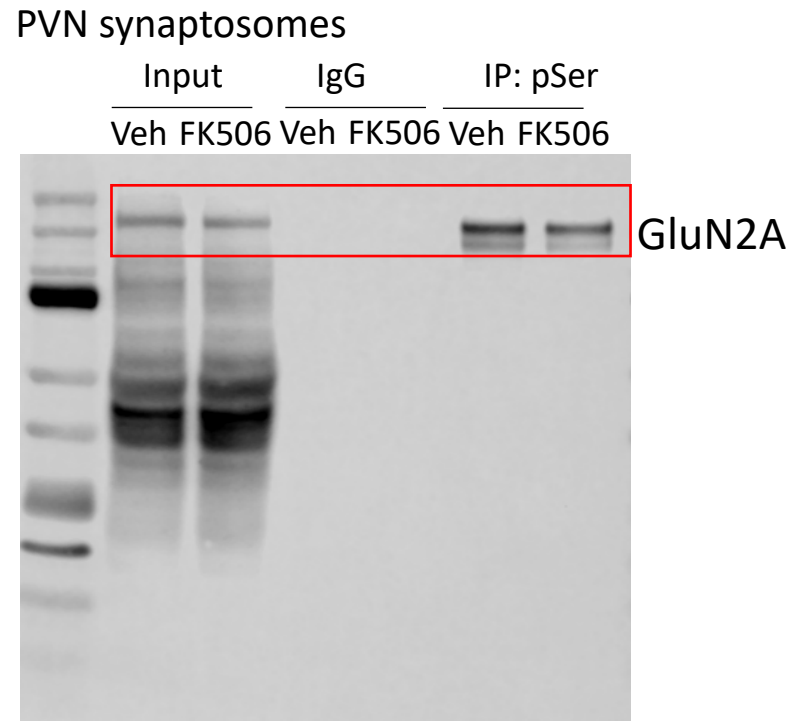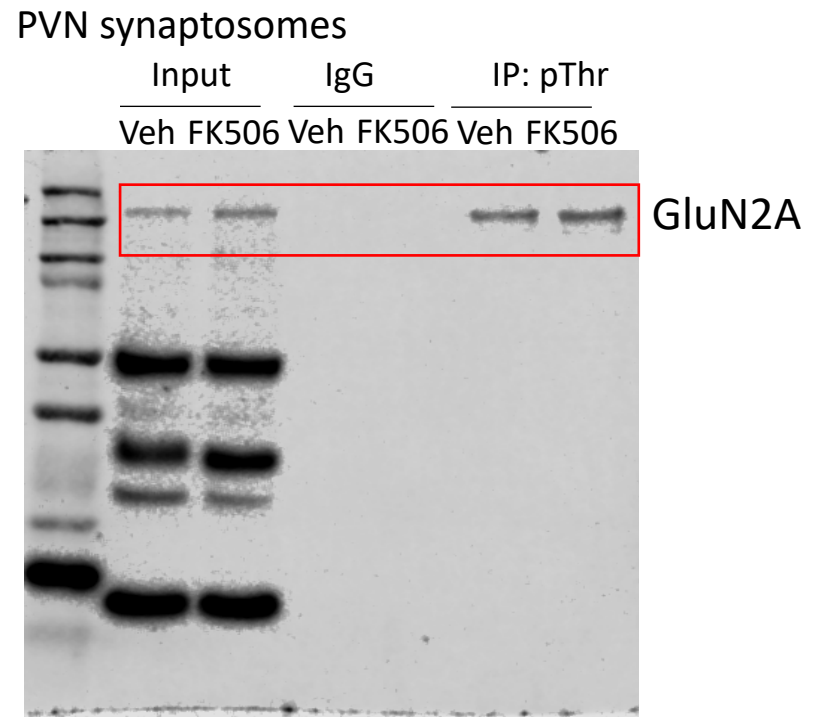

Fig. 2C

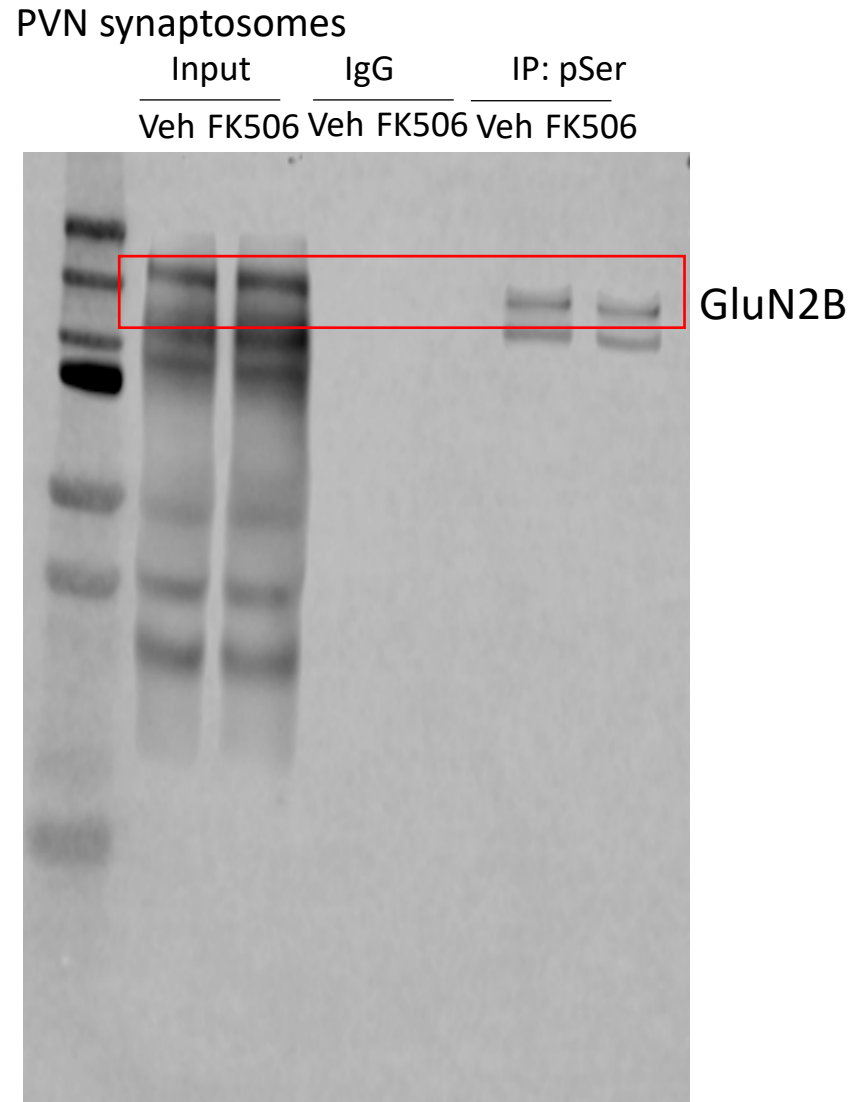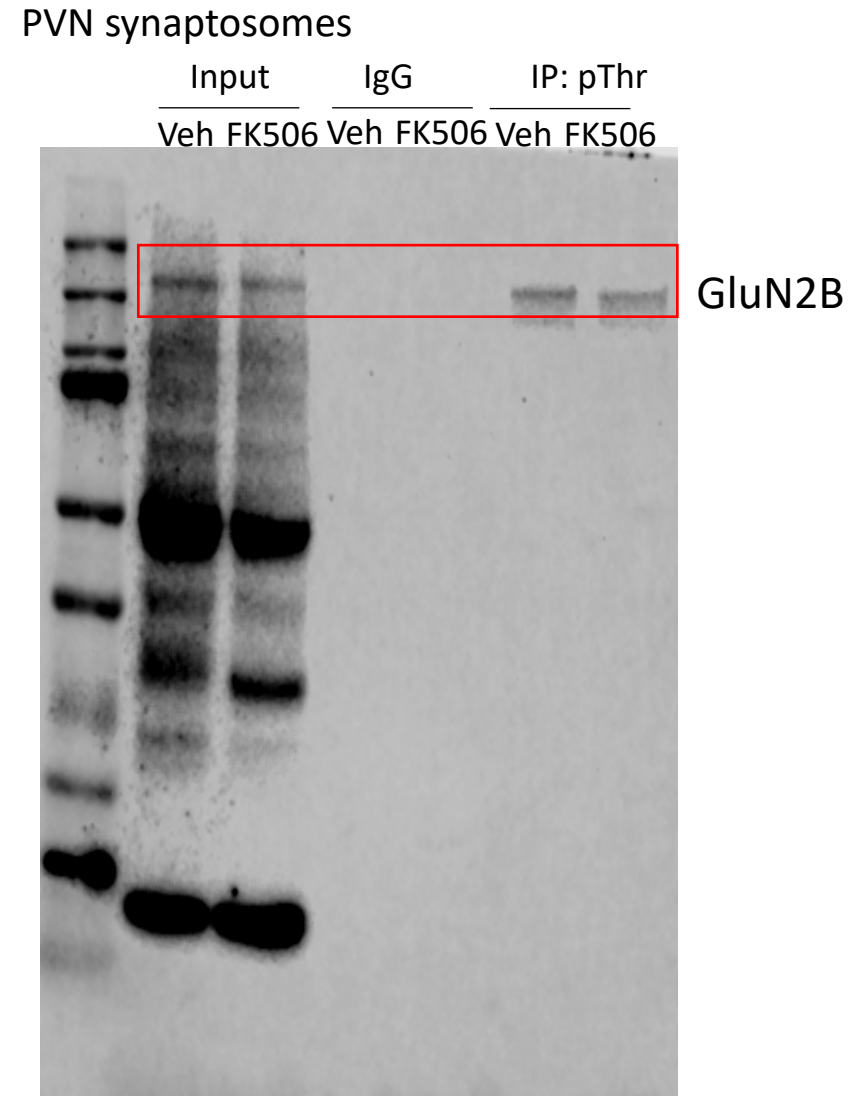

Fig. 2D

PVN tissue lysate

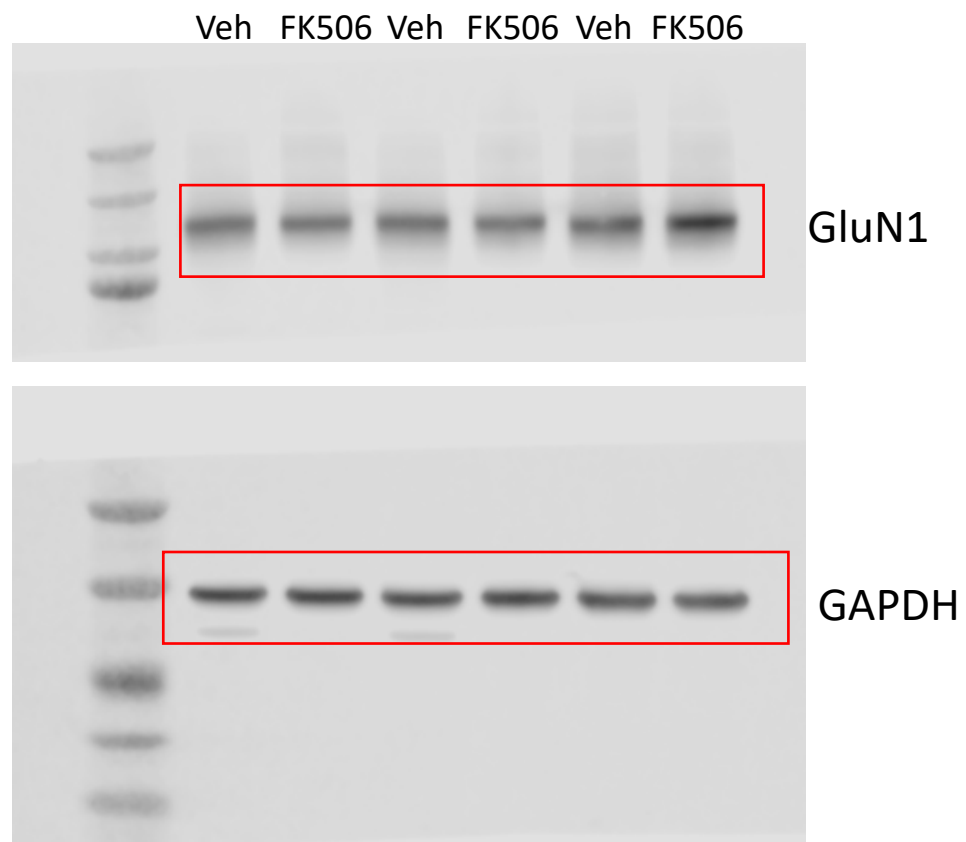

PVN synaptosomes

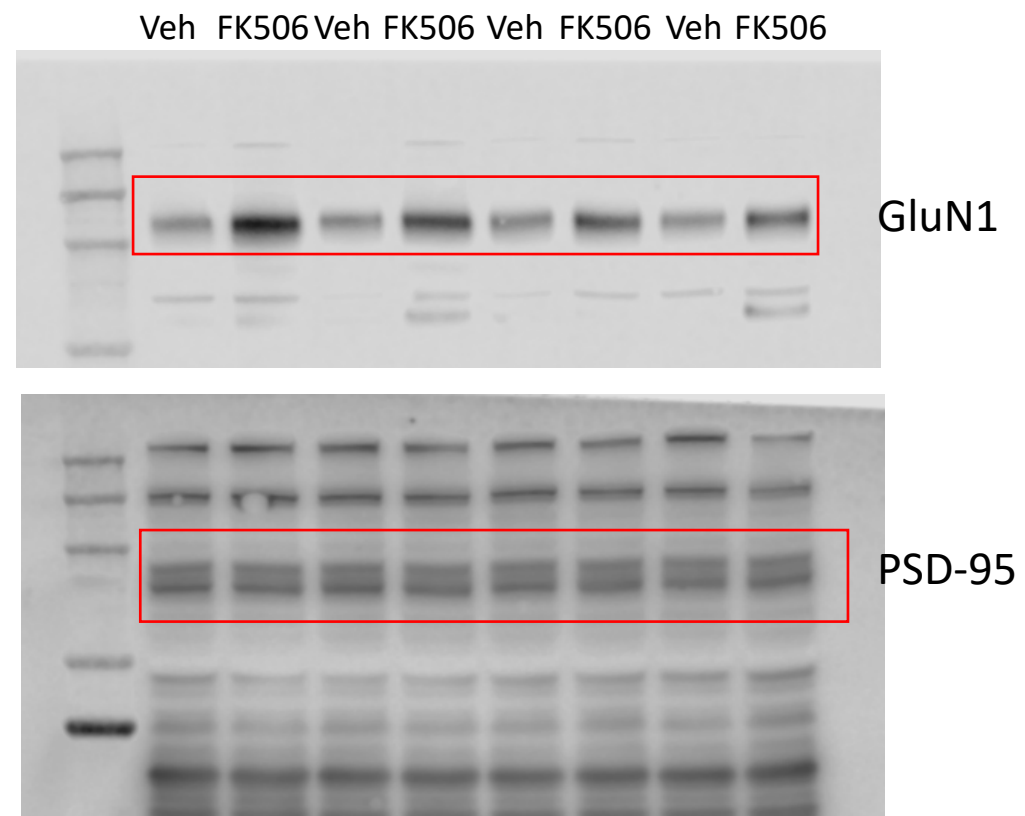

Supplement: NIHMS1820654-supplement-320976_Uncut_Gel_Blots.pdf [file NIHMS1820654-supplement-320976_Uncut_Gel_Blots.pdf]
